# Supplementary material
Source: Springer Nature journal article supplement (https://www.springermedizin.de/resource/supplementary/12879_2012_2942_MOESM4_ESM.pdf/9445410)

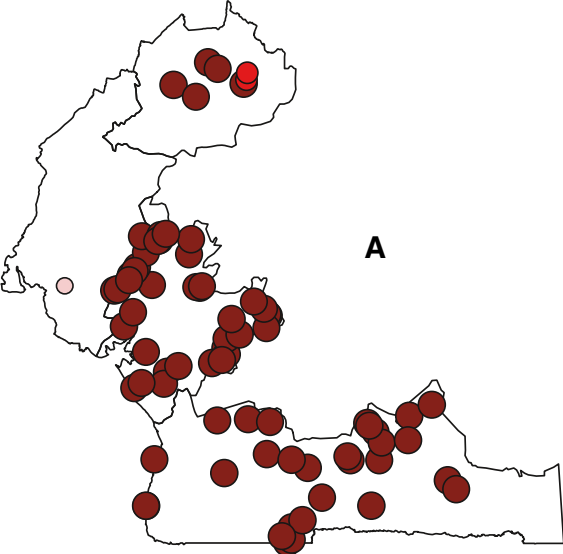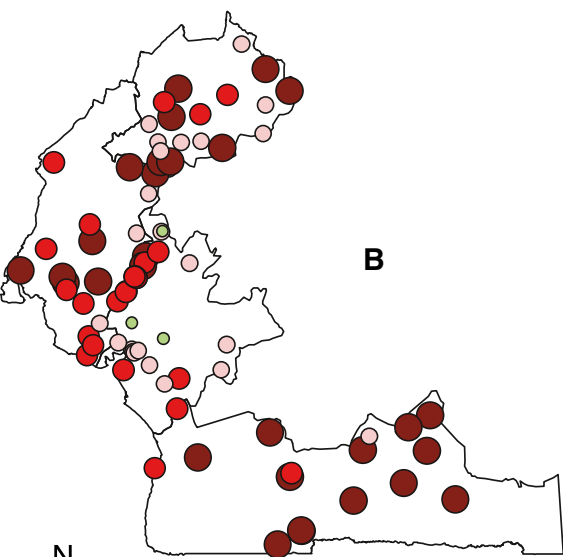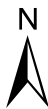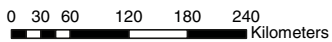

Supplement: MOESM4 [file 9445410]
